# Supplementary material for: Male and Female Subpopulations of Salix viminalis Present High Genetic Diversity and High Long-Term Migration Rates between Them
Source: Front Plant Sci. 2016 Mar 18;7:330. doi: 10.3389/fpls.2016.00330 (PMC4796010; doi:10.3389/fpls.2016.00330)
Supplement: Supplementary file 9 [file DataSheet1.XLS]

## Sheet: Data
20	144	10	15	15	15	15	13	13	15	15	14	14
Codominant data-fragment size			DHQF	DHQM	GHF	GHM	KDEF	KDEM	TLF	TLM	ZDF	ZDM
Sample	Pop	SB38		SB430		SB288		SB1172		SB617		SB896		SB1185		SB1324		SB392		SB984		SB355		SB1366		SB1148		SB565		SB800		gSIMCT052		SB24*		SB100*		Shuk058		Shuk124
HQH10F	DHQF	121	123	162	162	160	162	244	244	125	131	139	139	178	186	104	112	154	164	166	176	160	168	236	236	105	105	205	205	242	248	163	187	124	124	107	115	226	226	175	187
HQH11F	DHQF	111	121	160	174	164	166	218	244	131	131	139	143	186	188	104	104	164	164	166	176	160	162	236	242	105	107	205	205	234	248	171	191	134	136	107	111	214	226	171	175
HQH12F	DHQF	121	121	160	162	164	168	218	218	125	131	139	139	164	168	104	104	154	164	166	166	154	160	236	236	105	105	205	205	242	244	163	179	128	134	107	115	214	226	175	179
HQH13F	DHQF	121	123	162	174	162	164	242	244	131	131	139	139	186	186	104	104	164	164	166	168	166	166	236	236	105	107	205	205	242	246	163	163	122	136	107	107	214	226	175	175
HQH14F	DHQF	121	123	162	172	162	164	242	244	131	131	139	145	168	168	104	112	162	164	166	168	166	166	236	238	107	107	205	205	242	248	163	193	122	136	107	109	214	226	175	175
HQH15F	DHQF	121	121	162	172	162	162	242	242	121	131	139	141	178	186	104	108	148	148	166	168	160	168	236	236	107	107	205	205	242	242	177	177	128	130	111	111	226	226	173	175
HQH1F	DHQF	121	123	160	162	164	174	218	244	131	131	139	143	186	186	102	104	154	164	166	166	160	160	236	238	105	107	205	205	246	248	163	187	122	136	109	111	226	226	175	185
HQH2F	DHQF	121	121	162	162	152	160	218	218	127	131	133	143	186	186	104	110	164	164	166	176	160	162	238	242	105	107	193	205	242	242	163	187	122	132	107	107	226	226	175	191
HQH3F	DHQF	103	121	162	172	152	168	218	218	125	131	139	139	186	186	104	104	154	162	166	166	160	164	236	244	105	107	203	205	234	242	163	187	132	134	107	107	214	226	175	179
HQH4F	DHQF	121	121	160	162	164	166	218	244	131	131	139	143	186	186	104	112	152	164	166	166	160	162	236	236	105	105	193	205	240	242	187	193	122	134	111	111	226	226	175	175
HQH5F	DHQF	103	121	160	172	164	164	218	218	131	131	137	139	186	186	104	104	164	164	166	176	168	170	236	242	105	107	205	205	246	246	163	259	124	136	107	107	226	226	183	185
HQH6F	DHQF	103	121	162	162	164	166	244	244	131	131	129	139	178	186	104	110	162	164	166	176	168	170	236	236	105	107	205	205	242	248	163	177	124	128	107	107	226	226	171	181
HQH7F	DHQF	103	121	162	174	166	166	218	218	127	131	139	141	170	176	104	104	164	164	166	166	160	170	236	236	107	107	205	205	246	248	163	185	122	136	107	107	226	226	173	175
HQH8F	DHQF	121	121	160	174	164	186	218	218	131	131	139	139	170	186	104	104	154	164	166	176	160	168	236	236	107	107	205	205	232	242	139	187	122	136	107	107	214	226	173	191
HQH9F	DHQF	121	121	160	172	164	164	242	244	131	131	139	139	180	180	104	108	164	164	166	176	164	170	236	242	107	107	205	205	246	248	163	163	122	132	107	109	214	226	175	175
HQH10M	DHQM	121	121	162	172	160	164	218	244	131	131	137	139	174	186	104	110	162	164	166	168	160	168	236	244	105	107	205	205	242	248	173	187	122	134	115	115	226	226	175	175
HQH11M	DHQM	121	121	160	162	164	164	244	244	125	131	135	139	186	186	116	116	164	164	176	176	160	168	236	236	105	107	205	205	240	242	187	187	134	134	107	111	226	226	175	175
HQH12M	DHQM	121	121	162	174	164	166	218	244	131	131	135	139	186	186	104	110	164	164	166	166	164	168	236	242	107	107	205	205	234	246	163	163	122	136	109	115	226	226	175	185
HQH13M	DHQM	123	123	160	162	184	190	218	244	131	131	139	139	166	180	108	112	154	168	166	166	160	168	242	242	105	107	205	205	240	248	163	187	122	134	107	107	226	226	175	175
HQH14M	DHQM	121	123	162	162	160	184	218	244	131	131	137	139	168	186	104	112	162	164	166	166	160	160	236	236	107	107	205	205	240	240	177	187	128	134	109	109	226	226	171	175
HQH15M	DHQM	121	121	162	174	160	164	218	218	131	131	139	139	186	186	104	110	164	164	166	166	160	160	236	242	107	107	203	205	242	248	163	191	134	136	109	111	226	226	185	185
HQH1M	DHQM	121	121	162	172	164	174	218	244	131	131	135	139	186	186	104	104	154	164	166	166	160	172	236	242	105	107	205	205	246	248	139	163	128	134	107	109	226	226	173	175
HQH2M	DHQM	121	121	162	172	162	184	218	244	121	131	141	143	186	186	104	104	150	164	168	176	160	160	236	238	107	107	205	205	246	248	163	185	122	132	109	109	226	226	171	185
HQH3M	DHQM	103	121	162	174	164	184	218	226	131	131	141	143	168	186	104	106	162	164	166	168	160	160	236	238	105	107	203	205	234	234	177	191	134	134	107	111	226	226	175	179
HQH4M	DHQM	121	121	174	174	160	164	244	244	131	131	139	139	186	186	104	104	148	164	166	166	162	164	236	236	105	107	205	205	242	246	163	179	124	132	107	107	226	226	171	171
HQH5M	DHQM	103	111	174	174	164	164	218	244	131	131	133	139	186	186	104	105	154	154	166	166	164	164	236	242	107	109	205	205	246	250	187	193	132	134	107	111	226	226	175	175
HQH6M	DHQM	103	121	162	162	164	184	218	244	131	131	139	143	186	186	104	104	154	164	166	166	170	170	236	242	105	107	205	205	242	244	185	187	136	136	107	111	226	226	175	175
HQH7M	DHQM	103	121	162	174	164	184	216	244	131	131	133	139	186	186	104	104	164	164	166	168	154	160	242	242	105	107	205	205	234	246	185	191	122	134	107	109	214	226	175	185
HQH8M	DHQM	121	121	160	174	166	184	226	226	127	131	129	139	178	186	104	104	154	164	166	166	134	134	236	242	105	107	205	205	234	248	177	259	122	128	109	109	226	226	185	185
HQH9M	DHQM	121	121	160	164	152	162	242	244	131	131	133	139	186	186	104	110	162	164	166	166	164	168	236	236	105	107	205	205	246	250	185	191	122	122	107	109	226	226	175	175
GH10F	GHF	103	121	168	168	158	162	218	242	131	131	125	141	170	176	104	118	148	148	166	166	166	168	242	242	105	105	193	205	238	242	145	145	128	134	101	103	214	226	171	193
GH11F	GHF	111	111	156	168	154	154	218	218	125	131	129	135	162	162	106	112	148	152	162	166	156	176	238	242	105	107	205	205	238	242	203	219	132	134	115	115	214	226	179	197
GH12F	GHF	121	123	162	162	162	162	216	218	125	127	121	125	174	176	108	108	154	158	166	166	154	166	238	238	105	107	193	205	242	242	193	237	128	134	103	115	214	226	203	203
GH13F	GHF	111	123	160	160	156	162	218	218	125	127	123	135	176	176	108	118	152	154	166	166	166	166	238	242	105	105	193	205	242	242	187	217	134	134	103	103	226	226	195	203
GH14F	GHF	103	123	160	162	160	190	218	218	125	131	129	137	170	176	100	104	152	156	166	168	160	166	239	239	105	105	203	203	232	238	139	189	112	122	105	105	226	226	193	205
GH15F	GHF	103	111	162	172	152	170	222	242	131	131	137	143	164	170	104	106	150	158	166	168	160	160	238	242	105	105	205	205	232	238	189	191	124	124	101	101	214	226	171	171
GH1F	GHF	103	123	160	160	150	188	218	218	121	125	129	129	170	180	106	112	148	148	166	166	154	164	242	242	105	105	205	217	228	242	143	143	122	134	101	101	214	226	175	179
GH2F	GHF	111	123	160	178	160	176	218	244	127	131	137	143	180	180	104	118	140	148	166	166	158	166	238	238	105	107	193	193	224	242	139	177	122	134	103	107	226	226	179	201
GH3F	GHF	111	113	160	162	160	162	218	220	125	131	135	139	170	180	98	100	148	150	166	166	160	164	239	239	105	107	205	205	228	236	143	203	132	132	115	115	226	226	171	171
GH4F	GHF	111	113	160	168	152	194	196	214	121	125	125	129	166	174	104	104	140	168	166	166	160	160	239	239	105	107	205	205	228	242	163	191	132	136	107	115	214	214	173	195
GH5F	GHF	103	111	160	174	150	160	218	224	125	131	137	141	168	168	104	118	154	154	162	166	158	168	239	239	105	107	205	211	234	238	189	189	132	132	101	101	214	226	171	171
GH6F	GHF	111	123	164	168	156	184	196	220	131	131	129	139	186	186	104	106	148	148	162	166	166	166	238	242	105	109	205	205	234	252	141	189	134	134	101	103	214	226	203	205
GH7F	GHF	123	131	162	168	156	180	196	218	125	127	125	137	162	186	112	112	140	148	166	178	164	168	242	242	105	109	203	205	228	246	149	187	122	122	101	101	214	226	187	191
GH8F	GHF	103	123	162	162	158	188	218	244	121	125	137	137	164	164	98	104	154	164	166	166	154	160	239	239	105	109	205	205	228	228	151	201	122	122	103	109	214	214	171	179
GH9F	GHF	103	121	160	168	162	164	196	218	125	125	125	135	168	190	104	108	166	168	166	166	154	160	239	239	105	107	205	205	236	244	139	173	124	128	107	107	226	226	171	171
GH10M	GHM	111	111	160	162	158	168	218	228	127	131	139	143	162	186	104	108	150	154	166	166	158	164	238	242	105	107	193	205	226	226	163	187	120	122	107	107	214	214	171	205
GH11M	GHM	103	111	164	168	158	170	218	218	125	131	137	139	170	180	108	110	150	154	166	166	154	164	239	239	105	105	205	211	228	236	191	215	122	132	103	103	226	226	173	197
GH12M	GHM	121	129	162	174	146	150	196	218	125	131	129	135	174	186	108	108	150	168	166	166	168	176	238	238	105	107	205	205	244	246	203	203	122	128	101	107	226	226	171	191
GH13M	GHM	111	123	160	160	156	162	218	218	125	127	123	135	176	176	108	118	152	154	166	166	166	166	238	242	105	105	193	205	242	242	187	217	134	134	103	103	226	226	195	203
GH14M	GHM	121	123	160	162	150	158	220	246	125	131	141	151	170	170	98	106	140	148	164	166	154	168	239	239	105	105	193	205	226	226	201	201	132	132	103	107	214	214	171	171
GH15M	GHM	111	123	156	168	142	162	218	218	125	125	125	129	168	180	106	106	148	168	166	166	160	160	238	246	105	105	205	211	240	242	153	191	122	134	103	103	214	226	171	185
GH1M	GHM	103	111	160	162	182	186	218	218	125	131	125	145	176	176	102	106	152	168	166	166	160	168	238	238	105	105	203	205	236	250	259	259	132	134	103	115	226	226	175	179
GH2M	GHM	103	121	156	160	156	156	218	244	125	125	137	137	162	170	100	108	152	166	166	166	154	160	248	248	105	107	205	205	226	258	189	263	122	134	101	101	214	226	171	209
GH3M	GHM	111	111	160	168	150	180	218	228	125	127	133	137	170	170	110	118	156	166	166	166	160	164	238	242	105	105	205	211	228	242	181	257	120	124	115	115	214	226	171	185
GH4M	GHM	123	131	160	162	156	160	218	218	131	131	129	135	168	180	108	110	148	148	162	166	154	166	242	246	105	107	203	205	234	240	183	259	124	134	103	103	214	226	179	201
GH5M	GHM	103	111	160	174	150	160	218	224	125	131	137	141	168	168	104	118	154	154	162	166	158	168	239	239	105	107	205	211	234	238	189	189	132	132	101	101	214	226	171	171
GH6M	GHM	109	123	160	162	160	162	196	220	127	131	135	137	170	176	104	106	148	154	166	166	160	160	244	244	107	107	205	205	228	234	139	163	122	134	115	115	214	226	173	175
GH7M	GHM	111	113	160	160	158	164	218	228	131	131	129	129	170	170	108	108	154	168	166	166	134	164	242	246	105	105	205	205	240	250	137	203	132	132	103	103	214	214	183	205
GH8M	GHM	111	125	162	174	160	160	196	264	121	131	139	139	164	180	104	108	154	154	166	166	160	160	239	239	105	105	205	205	230	240	187	189	122	134	101	107	226	226	171	173
GH9M	GHM	111	123	162	162	158	160	196	218	125	127	137	139	170	176	108	110	154	158	166	166	160	160	238	242	105	105	205	205	236	238	201	237	122	132	101	101	226	226	193	201
KDE10F	KDEF	103	121	160	162	146	156	218	244	125	131	123	127	174	180	100	104	150	168	166	166	160	176	238	242	107	107	205	205	242	250	189	259	122	132	101	101	214	226	183	191
KDE11F	KDEF	121	125	162	174	146	184	218	264	131	131	135	139	170	170	108	108	140	148	166	168	162	164	238	242	105	109	205	207	228	234	139	201	124	132	107	107	226	226	195	207
KDE12F	KDEF	111	123	160	168	156	160	218	244	125	125	137	139	170	180	100	106	154	154	162	164	134	134	238	242	105	107	193	205	228	238	257	263	132	136	101	101	214	226	173	197
KDE13F	KDEF	111	123	160	174	168	186	218	228	125	131	133	139	164	164	108	108	146	154	162	166	160	160	238	238	105	105	197	205	238	242	177	189	134	136	107	107	226	226	171	171
KDE1F	KDEF	125	125	160	172	160	162	218	218	121	125	137	139	170	170	102	106	164	168	166	166	166	166	238	242	105	105	203	205	242	248	139	151	122	134	107	107	214	214	171	195
KDE2F	KDEF	103	121	156	162	150	166	204	264	125	127	133	137	170	176	104	104	150	158	164	166	166	174	242	246	107	109	205	205	236	238	139	259	130	130	101	101	226	226	173	193
KDE3F	KDEF	103	125	162	174	154	168	218	228	125	125	127	139	168	180	108	108	150	168	166	168	160	164	242	242	105	105	203	205	234	238	143	151	122	134	109	113	226	226	171	195
KDE4F	KDEF	123	127	162	172	162	162	196	218	131	131	127	143	162	168	106	106	150	154	166	168	158	168	238	244	107	109	205	205	250	252	141	215	122	134	103	111	214	214	183	197
KDE5F	KDEF	121	123	162	172	156	188	218	264	125	131	137	143	162	170	104	108	148	158	166	180	164	178	238	238	105	105	205	205	230	250	139	159	124	124	103	109	226	226	171	177
KDE6F	KDEF	103	123	162	162	156	178	196	244	125	125	135	139	180	180	100	110	148	154	162	166	160	160	238	240	105	107	205	219	226	250	139	177	120	122	103	103	214	226	171	173
KDE7F	KDEF	111	123	162	168	144	150	196	218	125	131	135	137	158	180	108	110	148	154	166	166	168	168	242	242	107	109	205	205	230	230	143	163	120	124	101	101	226	226	173	175
KDE8F	KDEF	111	133	160	168	160	162	216	244	121	125	129	135	168	168	100	108	154	168	160	166	160	160	242	248	105	109	205	205	228	238	157	217	124	134	103	111	214	226	171	171
KDE9F	KDEF	111	123	160	160	156	184	218	244	125	125	127	135	174	174	100	108	146	156	162	166	160	166	238	248	107	109	203	219	248	250	143	153	136	136	101	115	214	214	173	193
KDE10M	KDEM	111	111	160	162	146	166	218	244	125	125	129	135	174	180	104	104	140	150	166	166	158	166	238	248	107	107	205	205	226	234	189	217	122	132	103	103	226	226	189	195
KDE11M	KDEM	111	131	160	162	146	156	218	264	125	131	129	135	174	180	100	104	150	168	166	166	158	160	238	238	105	107	205	205	232	234	189	189	122	124	121	121	226	226	189	193
KDE12M	KDEM	111	123	160	168	156	160	218	244	125	125	137	139	180	180	100	106	154	154	162	164	134	134	238	242	105	107	193	205	228	238	257	263	132	136	101	101	214	226	173	197
KDE13M	KDEM	121	125	174	174	160	160	228	264	125	127	137	139	168	168	102	118	150	168	162	166	162	166	238	242	105	105	193	205	238	248	151	177	130	136	103	109	214	226	171	175
KDE1M	KDEM	111	121	162	168	164	174	196	264	125	131	133	137	170	170	104	106	150	164	168	180	160	160	238	242	105	109	193	205	242	250	151	203	122	124	103	107	214	214	171	171
KDE2M	KDEM	111	123	162	174	160	188	218	218	125	127	137	139	170	186	106	110	148	150	166	168	154	170	238	238	105	107	193	205	242	248	139	193	122	132	103	103	214	256	171	177
KDE3M	KDEM	111	123	162	162	146	162	218	218	125	131	129	137	162	170	104	104	152	154	162	166	158	166	239	239	105	107	205	205	234	240	187	203	122	136	103	103	214	226	171	191
KDE4M	KDEM	111	123	160	172	154	166	218	218	125	127	129	137	174	174	104	108	140	154	166	166	164	168	238	238	105	107	205	205	240	250	179	215	122	132	101	101	214	226	171	197
KDE5M	KDEM	121	121	162	174	160	174	218	264	127	131	137	139	170	186	106	106	140	150	166	168	166	166	239	239	105	105	205	205	242	250	193	237	124	132	103	103	226	256	171	171
KDE6M	KDEM	121	123	162	174	160	176	218	218	127	131	137	139	170	176	106	106	140	150	166	166	166	166	238	238	105	107	193	205	242	250	193	237	122	132	107	113	214	226	171	177
KDE7M	KDEM	111	125	156	162	162	164	196	244	127	131	135	135	170	170	98	108	148	154	162	166	160	160	238	238	105	105	193	205	236	238	177	187	124	134	109	109	226	226	171	171
KDE8M	KDEM	111	111	160	162	160	166	216	218	121	131	137	143	170	176	100	108	148	154	160	166	158	164	242	242	105	105	205	205	238	244	141	141	132	136	101	115	214	214	171	177
KDE9M	KDEM	111	111	160	160	160	162	218	218	125	127	125	141	170	170	98	100	140	150	168	176	164	166	242	242	105	107	197	205	230	244	145	155	124	130	101	109	226	226	171	179
TL10F	TLF	123	123	162	162	156	164	218	264	125	131	129	129	164	180	98	116	154	154	166	166	154	160	238	238	105	107	205	211	228	248	139	165	132	134	103	111	214	226	173	173
TL11F	TLF	113	123	160	164	142	158	196	246	125	131	137	137	170	170	106	106	154	158	166	166	174	174	230	246	105	109	205	205	234	248	159	179	132	132	101	101	226	226	171	185
TL12F	TLF	121	121	160	162	156	184	216	228	125	131	129	137	170	176	98	106	146	154	168	168	156	164	239	239	105	107	205	205	242	252	139	187	122	124	101	101	214	214	171	191
TL13F	TLF	123	123	162	174	156	156	196	220	131	131	129	137	170	194	104	112	148	158	166	166	154	154	238	242	105	105	193	197	228	240	179	179	124	128	101	101	226	226	185	205
TL14F	TLF	103	111	168	174	148	168	228	264	125	125	127	139	168	168	100	108	150	168	164	166	160	160	240	240	105	105	203	205	234	242	151	185	128	134	113	113	226	226	171	171
TL15F	TLF	113	123	162	162	158	174	240	266	131	131	137	139	170	170	98	118	146	152	166	166	170	178	239	239	107	107	193	205	238	240	143	151	122	134	117	117	226	226	171	171
TL1F	TLF	111	121	160	162	156	160	196	242	125	131	135	137	176	186	104	105	154	158	166	166	134	166	242	248	105	105	205	205	226	234	163	177	122	130	111	111	226	226	171	203
TL2F	TLF	121	123	160	172	158	160	244	264	125	131	137	139	174	174	98	108	164	166	166	176	160	186	239	239	105	107	203	203	230	248	187	189	122	134	101	103	214	226	171	201
TL3F	TLF	113	121	162	172	154	184	220	228	125	131	125	141	162	164	100	102	148	168	166	166	156	156	239	239	105	107	193	205	236	242	177	185	124	124	101	103	214	214	171	183
TL4F	TLF	103	123	160	162	158	160	206	264	121	125	125	143	180	180	104	105	148	168	164	166	154	154	238	242	105	107	193	205	242	246	185	189	122	130	101	101	214	226	195	199
TL5F	TLF	111	111	156	160	160	180	196	218	125	131	129	137	168	176	106	106	150	164	166	166	166	178	242	242	105	107	205	205	232	246	163	179	122	134	107	107	226	226	171	173
TL6F	TLF	111	111	162	168	184	188	218	218	127	131	135	147	164	180	98	108	154	154	166	168	160	160	238	242	105	107	205	205	228	234	137	137	122	130	127	127	226	226	183	183
TL7F	TLF	113	123	160	162	150	156	244	246	125	131	133	143	180	186	98	106	146	150	166	166	166	166	242	244	105	107	197	205	228	246	145	191	134	134	113	113	214	226	171	187
TL8F	TLF	111	131	162	168	138	186	218	244	125	131	137	139	162	170	102	104	156	158	166	166	178	180	246	246	105	105	205	205	236	242	167	189	134	134	107	109	214	226	191	193
TL9F	TLF	111	121	160	162	174	196	218	218	131	131	123	129	176	176	106	108	154	154	166	166	164	176	238	242	105	107	205	205	236	242	141	189	124	134	103	103	214	226	203	217
TL10M	TLM	105	123	160	162	154	158	228	244	125	131	129	137	174	174	100	104	148	152	166	166	146	166	238	242	105	105	193	205	232	248	151	185	122	122	103	103	214	214	195	213
TL11M	TLM	111	127	160	162	164	174	218	264	125	131	137	143	164	176	104	104	140	150	166	168	160	164	238	238	105	107	205	205	248	248	143	157	124	124	101	101	214	214	193	193
TL12M	TLM	111	123	160	160	160	166	214	228	125	133	125	135	170	170	104	108	140	152	166	166	160	162	242	242	107	107	199	205	240	242	217	217	124	128	103	107	214	214	171	171
TL13M	TLM	123	127	168	174	160	184	218	246	125	131	139	141	162	170	104	104	152	154	166	166	160	178	238	238	105	107	203	205	238	252	139	219	122	124	107	107	214	226	191	219
TL14M	TLM	111	123	160	162	182	196	218	244	125	125	123	137	170	176	108	110	150	168	166	166	134	134	238	246	107	109	205	211	240	242	159	215	122	122	117	117	226	226	171	193
TL15M	TLM	121	123	160	168	174	186	196	266	131	131	135	143	162	170	106	106	152	154	166	166	160	166	238	248	105	105	205	205	238	248	157	187	122	138	101	103	214	226	171	185
TL1M	TLM	111	125	168	168	160	162	218	218	125	131	129	139	170	180	108	108	158	166	166	168	160	160	242	242	105	105	191	191	236	252	185	185	132	134	103	107	214	226	171	193
TL2M	TLM	111	123	160	168	160	160	218	244	125	127	125	129	176	176	102	118	148	154	162	166	154	166	239	242	107	107	199	205	228	248	139	181	122	134	105	105	214	214	191	191
TL3M	TLM	111	121	160	162	186	190	218	218	125	125	129	129	170	170	108	108	152	152	162	168	166	176	238	248	105	107	193	205	240	242	167	187	122	122	101	115	214	226	173	197
TL4M	TLM	121	125	162	162	146	156	222	222	125	125	137	139	170	170	104	105	154	164	154	166	168	168	239	239	107	107	203	207	240	242	173	173	124	132	103	103	214	214	171	179
TL5M	TLM	123	123	156	162	160	170	218	218	125	125	129	139	170	176	104	105	154	156	162	166	160	178	239	239	105	105	193	197	228	228	187	203	124	124	103	107	214	226	171	171
TL6M	TLM	103	121	160	162	156	160	246	264	125	125	137	143	180	180	104	108	164	164	166	166	160	164	238	248	105	105	193	205	226	240	161	179	124	134	103	103	226	226	193	205
TL7M	TLM	121	121	162	162	156	164	218	218	131	131	141	141	162	176	108	116	152	164	166	166	164	164	240	242	105	105	205	205	226	226	145	203	122	132	101	101	214	226	173	175
TL8M	TLM	111	131	162	168	138	186	218	244	125	131	137	139	162	170	102	104	156	158	166	166	178	180	246	246	105	105	205	205	236	242	167	189	134	134	107	109	214	226	191	193
TL9M	TLM	113	123	160	168	158	158	264	264	125	125	139	143	180	180	108	108	164	164	166	166	160	160	244	244	105	107	205	205	242	242	185	187	124	134	101	103	214	226	171	173
ZD10F	ZDF	109	121	156	162	160	164	228	244	127	131	125	139	170	176	98	104	154	156	166	166	160	160	242	242	105	105	205	205	228	250	139	139	124	134	107	107	226	226	171	171
ZD11F	ZDF	103	123	160	174	164	208	218	246	121	125	137	141	186	186	100	104	164	170	166	168	160	166	238	242	105	107	205	205	234	248	187	203	122	130	115	119	214	214	171	207
ZD12F	ZDF	123	125	160	162	158	164	214	218	125	131	135	139	170	170	100	104	154	162	166	170	160	166	238	238	105	107	197	205	238	242	139	139	124	134	107	107	226	226	171	185
ZD13F	ZDF	117	123	160	162	164	166	218	246	131	131	129	161	170	170	102	104	148	168	166	168	160	168	238	242	107	107	205	213	238	250	177	177	124	132	111	115	226	226	171	177
ZD14F	ZDF	125	129	156	162	164	170	218	218	125	125	137	139	158	192	104	104	148	168	166	168	164	166	238	242	105	107	205	205	234	244	139	151	124	132	107	107	226	226	171	171
ZD1F	ZDF	111	121	156	162	160	162	218	218	125	127	139	141	170	170	100	104	154	154	164	168	160	160	238	244	105	107	205	205	238	242	203	203	124	136	105	107	226	226	171	171
ZD2F	ZDF	121	123	160	172	150	150	218	228	121	131	125	143	170	176	118	118	154	164	166	166	134	164	239	242	105	105	203	203	242	242	139	139	134	136	105	105	214	226	171	179
ZD3F	ZDF	123	123	160	162	162	164	218	244	127	131	133	141	170	170	104	104	154	166	166	170	160	160	236	242	105	107	203	203	240	244	187	263	122	134	119	119	226	226	187	217
ZD4F	ZDF	115	123	160	162	162	198	216	244	127	131	133	135	162	170	106	110	150	150	164	166	160	168	242	242	105	107	203	203	234	242	139	163	124	136	107	107	226	226	175	209
ZD5F	ZDF	121	123	162	168	162	164	218	244	127	131	125	139	158	158	104	104	140	148	166	166	164	168	238	244	105	105	205	205	238	244	179	215	128	134	101	101	226	226	195	207
ZD6F	ZDF	123	123	160	160	158	174	218	228	125	125	135	143	168	168	104	110	158	168	166	168	160	160	242	242	105	107	193	205	244	248	139	187	122	132	107	107	214	226	171	175
ZD7F	ZDF	121	121	162	174	138	158	218	218	131	131	129	135	170	170	104	105	160	166	166	168	134	160	238	238	107	107	203	205	242	242	187	261	122	136	103	103	226	226	171	189
ZD8F	ZDF	123	123	160	160	158	184	244	244	127	131	137	141	158	194	104	104	148	164	164	168	164	168	239	239	105	107	205	211	238	242	185	187	124	128	101	107	214	226	175	179
ZD9F	ZDF	121	121	160	174	158	162	218	218	125	125	131	139	162	170	104	105	148	154	166	166	160	160	238	238	105	107	205	205	242	242	177	183	124	128	107	115	226	226	171	171
ZD10M	ZDM	121	121	160	174	164	170	228	228	121	131	139	139	170	176	104	118	148	156	166	176	160	160	238	242	105	107	203	205	236	242	141	257	134	136	107	107	226	226	171	185
ZD11M	ZDM	103	121	160	160	164	164	228	246	121	125	137	137	174	174	100	102	148	148	166	168	160	166	238	238	107	107	205	211	224	234	139	157	122	134	101	107	226	250	171	171
ZD12M	ZDM	103	123	160	160	150	164	218	244	127	127	131	145	176	176	104	106	156	166	166	166	160	172	239	239	105	105	193	205	240	244	177	177	124	130	103	115	226	226	171	193
ZD13M	ZDM	103	125	156	162	158	164	218	218	121	125	129	137	158	192	104	105	140	148	166	168	160	166	238	242	105	107	193	205	228	240	139	151	124	134	107	115	226	226	171	171
ZD14M	ZDM	123	123	174	174	160	164	218	228	131	131	133	139	170	190	106	108	154	164	166	178	160	162	238	238	105	109	203	205	242	242	139	153	136	136	107	115	226	226	175	185
ZD1M	ZDM	121	123	160	162	158	182	218	244	125	131	133	133	168	168	108	108	148	152	166	176	160	176	238	238	105	109	205	205	238	242	143	187	124	134	105	107	214	226	173	189
ZD2M	ZDM	121	123	160	162	158	162	206	246	125	127	133	139	174	174	100	104	148	152	164	166	160	160	242	246	105	105	197	205	232	232	177	191	124	134	103	107	226	250	171	171
ZD3M	ZDM	123	123	160	172	162	196	218	242	125	131	135	139	170	170	104	105	140	166	166	168	160	166	238	242	107	107	205	207	240	242	143	153	124	128	103	107	214	226	171	171
ZD4M	ZDM	121	123	162	174	158	170	218	244	125	127	127	129	170	170	104	106	148	164	166	166	160	168	238	242	105	107	193	205	242	250	189	257	122	134	107	111	214	226	171	171
ZD5M	ZDM	123	123	158	160	170	186	242	244	125	125	133	143	170	170	104	106	154	166	166	170	160	160	236	242	105	109	193	205	240	244	139	177	130	134	101	117	226	226	189	217
ZD6M	ZDM	123	125	172	172	172	180	218	246	125	131	141	143	174	174	98	104	148	154	178	178	160	168	238	238	107	107	203	203	242	242	139	187	124	134	107	107	226	226	173	179
ZD7M	ZDM	123	123	156	162	156	160	228	246	127	131	143	147	170	170	104	104	150	168	166	166	160	166	238	242	105	105	205	217	236	242	139	195	128	136	107	107	226	226	175	191
ZD8M	ZDM	121	121	160	174	162	164	218	244	131	131	137	139	170	170	98	104	146	160	166	166	160	160	238	244	105	105	205	205	238	238	187	261	124	134	101	115	226	226	171	185
ZD9M	ZDM	111	121	160	160	156	168	218	244	125	131	139	143	176	176	100	106	164	166	166	168	160	160	238	242	105	107	203	211	234	248	153	257	134	136	107	107	226	250	171	171
